# Supplementary material for: Enhancing the thermoelectric performance of GeTe through Sb doping and nanocompositing with SiC for reduced thermal conductivity
Source: Royal Society of Chemistry journal article supplement (doi:10.1039/d4qi00451e), 2024-01-01
Supplement: d4qi00451e1.pdf [file d4qi00451e1.pdf]

## Supporting Information

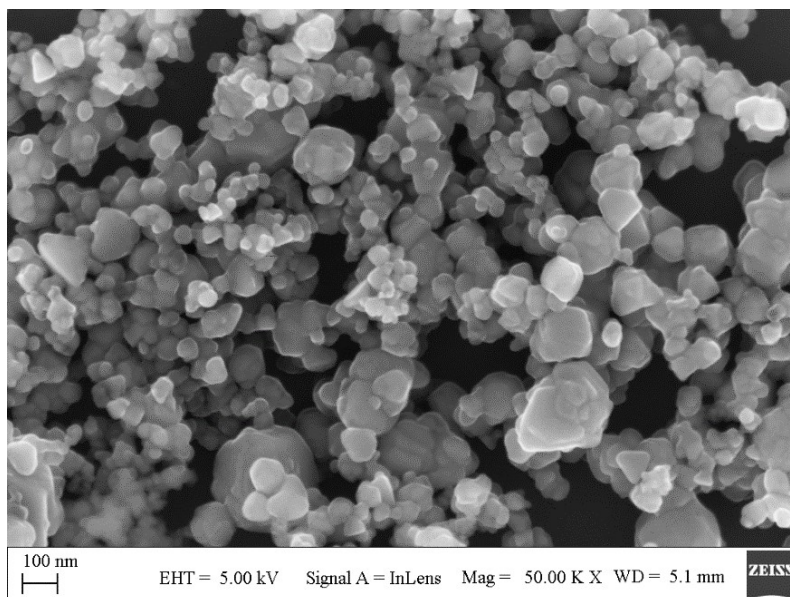

Figure S1 SEM image of SiC nano powders.

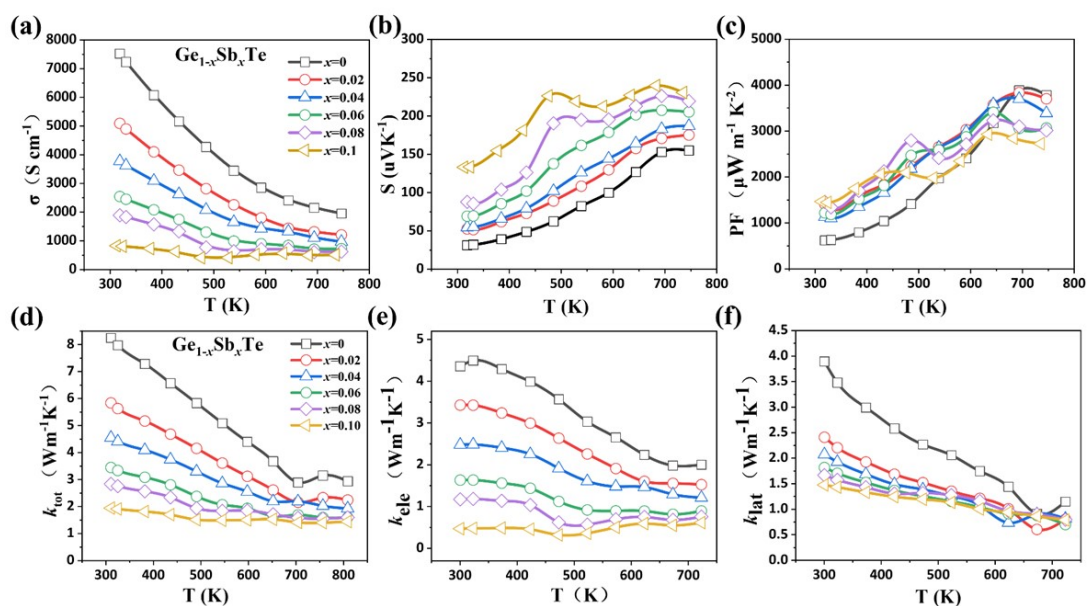

Figure S2 Temperature dependence of the electrical transport characteristics of  $\text{Ge}_{1-x}\text{Sb}_x\text{Te}$  ( $x = 0, 0.02, 0.04, 0.06, 0.08,$  and  $0.10$ ): (a) electrical conductivity, (b) Seebeck coefficient, (c) PF, (d) total thermal conductivity, (e) carrier thermal conductivity, and (f) lattice thermal conductivity.

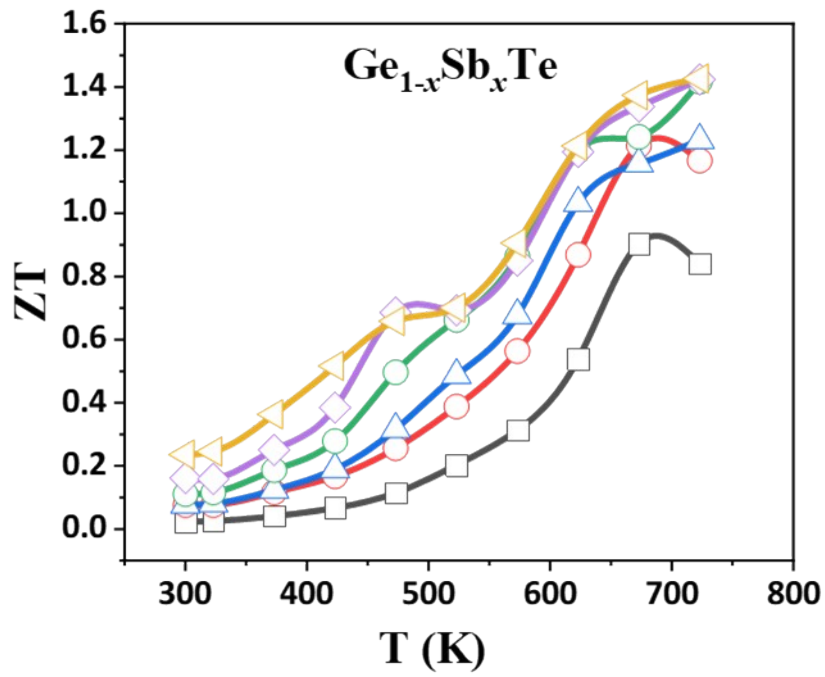

**Figure S3** ZT values of the samples Ge<sub>1-x</sub>Sb<sub>x</sub>Te ( $x = 0, 0.02, 0.04, 0.06, 0.08,$  and  $0.10$ ) as a function of temperatures.

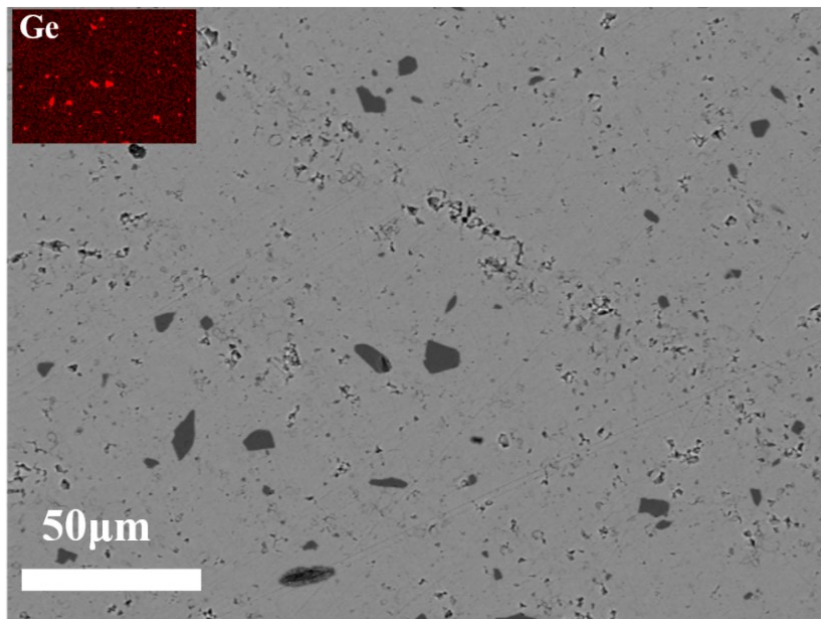

**Figure S4** The second phase of Ge in SEM images.

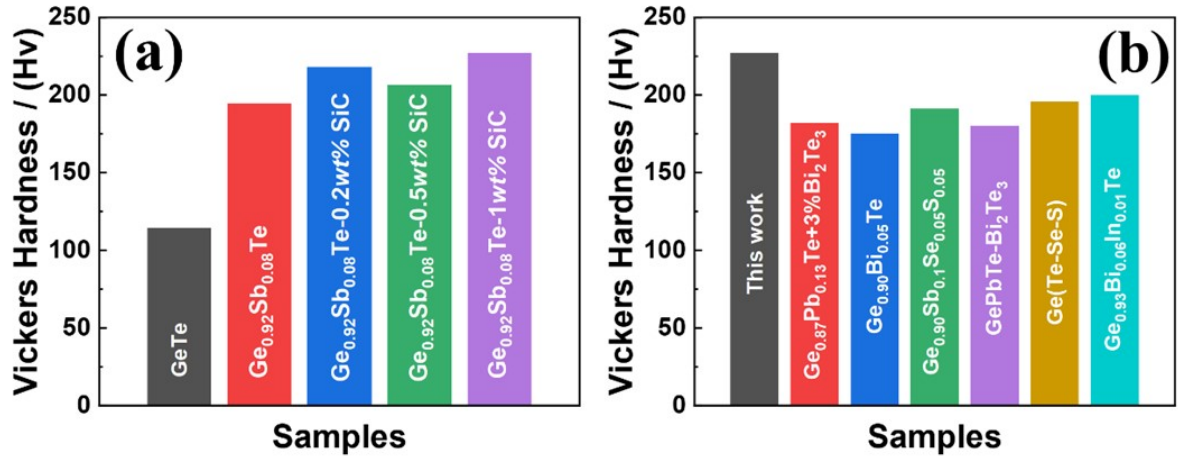

Figure S5 (a) Vickers microhardness of samples Ge<sub>0.92</sub>Sb<sub>0.08</sub>Te+y wt%SiC, (b) Microhardness of some typical thermoelectric compounds.

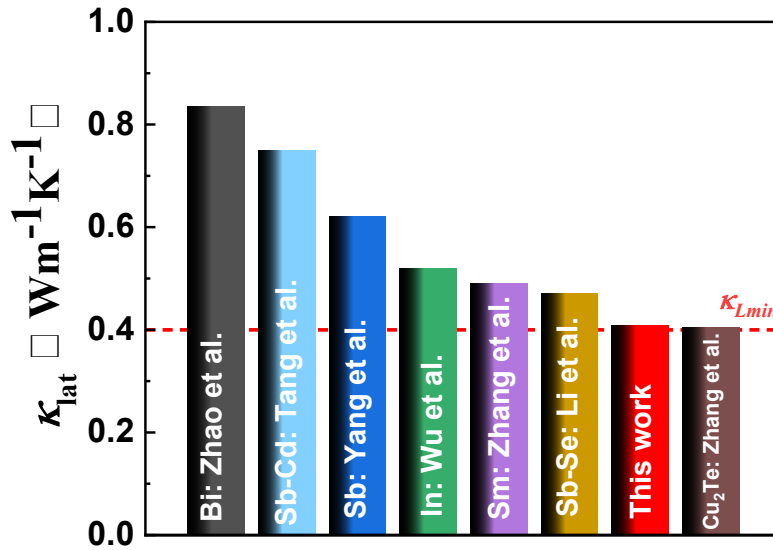

Figure S6 comparison of κ<sub>L</sub> in GeTe systems.<sup>1-7</sup>

## 1. Geometric model design

A single-leg thermoelectric generator (TEG) is a device designed to convert heat energy directly into electrical power using the Seebeck effect, a phenomenon where a temperature difference across a thermoelectric material result in the generation of an electric voltage. In the case of a single-leg TEG, there is only one thermoelectric leg (either p-type or n-type) through which the heat flows. **Figure S7** illustrates the configuration of the single-leg thermoelectric generator (TEG) with a size of 2.5 × 2.5 × 3.8 mm. The single-leg TEG comprises ceramic plates, electrical insulators, copper conductors, and p-type thermoelectric

materials. One side of the thermoelectric leg is exposed to a heat source, and the other side is in contact with a heat sink or a region at a lower temperature. The temperature gradient between these two sides induces a voltage potential across the thermoelectric material, leading to the generation of electric power. Geometric structures for the TEG were constructed, and COMSOL MULTIPHYSICS software was employed for the analysis of material properties. In order to achieve optimal results, it is imperative to conduct an overall resistance measurement through COMSOL, as the external resistance and internal resistance are identical. Subsequently, the measured resistance values are utilized as the external resistance values for further simulation.

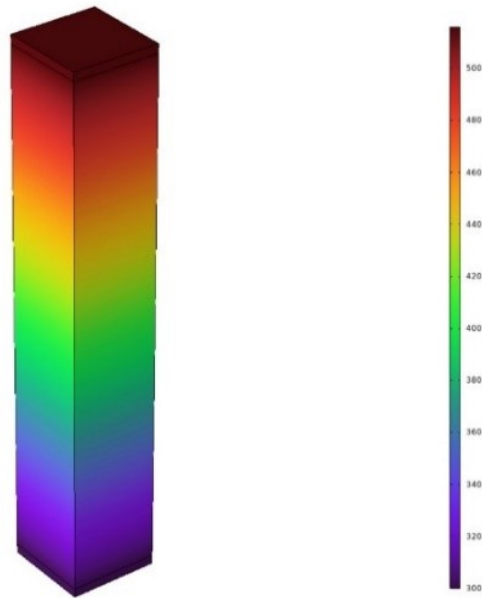

**Figure S7** The geometric structure and simulated results of single-leg TEG.

## 2. Stimulation performance of TEG

**Figure S8** illustrates the relationship between output voltage ( $V$ ) and current ( $I$ ) across various temperature gradients ( $\Delta T$ ), when the cold side temperature is fixed at 300 K. The observed linear characteristics of the V-I curves facilitate the determination of the open-circuit voltage ( $V_{OC}$ ), identified as the y-intercept, and the internal resistance ( $R_{in}$ ), represented by the slope. The rise in  $V_{OC}$  and  $R_{in}$  with an increasing  $\Delta T$  can be attributed to the heightened Seebeck coefficient and resistivity of GeTe alloys.

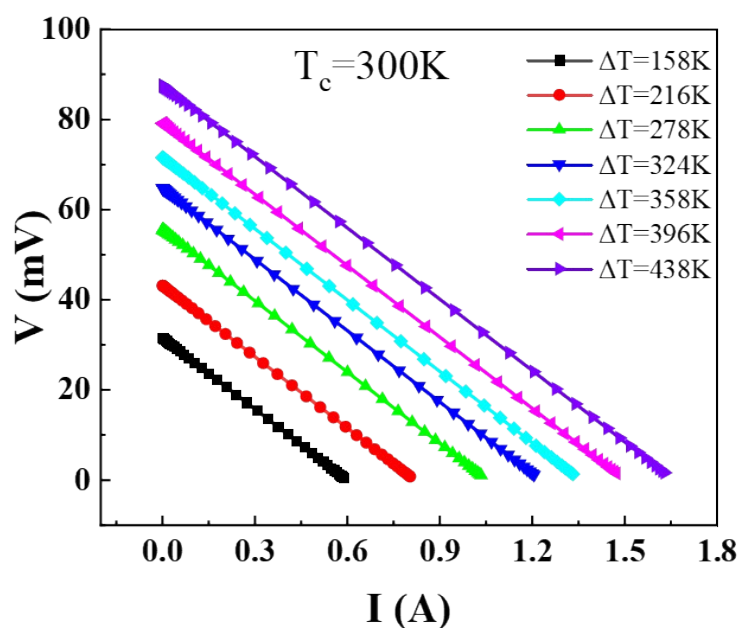

**Figure S8** Current-dependent output voltage.

1. Jin, Y.; Xiao, Y.; Wang, D.; Huang, Z.; Qiu, Y.; Zhao, L.-D., Realizing High Thermoelectric Performance in GeTe through Optimizing Ge Vacancies and Manipulating Ge Precipitates. *ACS Applied Energy Materials* **2019**, *2* (10), 7594-7601.
2. Nshimiyimana, E.; Hao, S.; Su, X.; Zhang, C.; Liu, W.; Yan, Y.; Uher, C.; Wolverton, C.; Kanatzidis, M. G.; Tang, X., Discordant nature of Cd in GeTe enhances phonon scattering and improves band convergence for high thermoelectric performance. *Journal of Materials Chemistry A* **2020**, *8* (3), 1193-1204.
3. Jin, Y.; Wang, D.; Qiu, Y.; Zhao, L.-D., Boosting the thermoelectric performance of GeTe by manipulating the phase transition temperature via Sb doping. *Journal of Materials Chemistry C* **2021**, *9* (20), 6484-6490.
4. Wu, L.; Li, X.; Wang, S.; Zhang, T.; Yang, J.; Zhang, W.; Chen, L.; Yang, J., Resonant level-induced high thermoelectric response in indium-doped GeTe. *NPG Asia Materials* **2017**, *9* (1), e343-e343.
5. Zhang, T.; Deng, S.; Zhao, X.; Ruan, X.; Qi, N.; Chen, Z.; Su, X.; Tang, X., Regulation of Ge vacancies through Sm doping resulting in superior thermoelectric performance in GeTe. *Journal of Materials Chemistry A* **2022**, *10* (7), 3698-3709.
6. Liu, W. D.; Wang, D. Z.; Liu, Q.; Zhou, W.; Shao, Z.; Chen, Z. G., High-Performance GeTe-Based Thermoelectrics: from Materials to Devices. *Advanced Energy Materials* **2020**, *10* (19).

7. Zhang, Q.; Ti, Z.; Zhu, Y.; Zhang, Y.; Cao, Y.; Li, S.; Wang, M.; Li, D.; Zou, B.; Hou, Y.; Wang, P.; Tang, G., Achieving Ultralow Lattice Thermal Conductivity and High Thermoelectric Performance in GeTe Alloys via Introducing Cu<sub>2</sub>Te Nanocrystals and Resonant Level Doping. *ACS Nano* **2021**, *15* (12), 19345-19356.
